# Supplementary material for: Pdgfrα-Cre mediated knockout of the aryl hydrocarbon receptor protects mice from high-fat diet induced obesity and hepatic steatosis
Source: PubMed Central journal article supplement (PMC7392206; doi:10.1371/journal.pone.0236741), 2020-07-30
Supplement: pone.0236741.s002.pdf [file pone.0236741.s002.pdf]

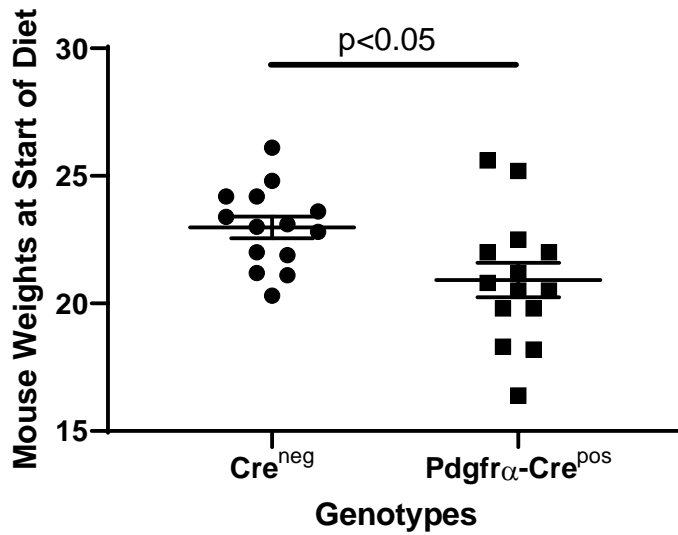

**S2:** Starting weights of 6- to 7-week old male Cre<sup>neg</sup> or Pdgfr $\alpha$ -Cre<sup>pos</sup> Ahr<sup>fl/fl</sup> mice used in the study. The starting weights of all the mice of the different genotypes, regardless of eventual diet type, were pooled. Statistical analysis was performed using a student t-test in GraphPad Prism. Error bars represent standard error of the mean.
