# Supplementary material for: Pdgfrα-Cre mediated knockout of the aryl hydrocarbon receptor protects mice from high-fat diet induced obesity and hepatic steatosis
Source: PubMed Central journal article supplement (PMC7392206; doi:10.1371/journal.pone.0236741), 2020-07-30
Supplement: pone.0236741.s003.pdf [file pone.0236741.s003.pdf]

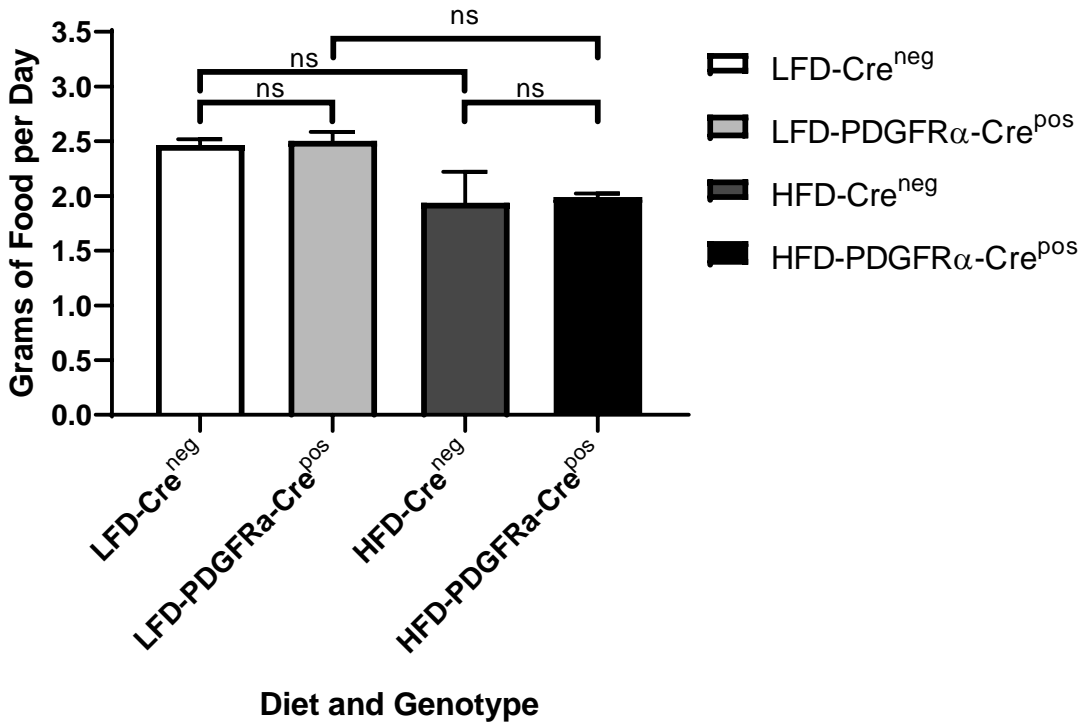

**S3:** Daily food intake comparisons between Cre<sup>neg</sup> and Pdgfrα-Cre<sup>pos</sup> Ahr<sup>fl/fl</sup> mice on control or HFD diet. Consumption of food of individually housed mice was measured over a week and average daily intake was calculated. Statistical analysis was performed using a One-Way ANOVA with multiple comparisons in GraphPad Prism. Error bars represent standard error of the mean.

:
