# Supplementary material for: Pdgfrα-Cre mediated knockout of the aryl hydrocarbon receptor protects mice from high-fat diet induced obesity and hepatic steatosis
Source: PubMed Central journal article supplement (PMC7392206; doi:10.1371/journal.pone.0236741), 2020-07-30
Supplement: pone.0236741.s004.pdf [file pone.0236741.s004.pdf]

**Supplemental Table I: Assessment of Steatosis in HFD Mouse Livers**

| Mouse number          | <sup>a</sup> Field 1 | 2    | 3    | 4    | 5    | 6    | 7    | 8    | 9    | 10   | Steatosis Range | <sup>b</sup> Steatosis Rank |
|-----------------------|----------------------|------|------|------|------|------|------|------|------|------|-----------------|-----------------------------|
| Cre <sup>neg</sup> -1 | >75%                 | >75% | >75% | >50% | >50% | >50% | >75% | >75% | >75% | >75% | 50-75%          | 3                           |
| Cre <sup>neg</sup> -2 | >75%                 | >75% | >75% | >75% | >75% | >75% | >75% | >75% | >75% | >75% | 75-100%         | 1                           |
| Cre <sup>neg</sup> -3 | >75%                 | >75% | >75% | >75% | >75% | >75% | ~50% | >75% | >75% | >75% | 75%             | 2                           |
| Cre <sup>neg</sup> -4 | ~15%                 | ~10% | ~10% | ~10% | ~20% | ~20% | ~25% | ~15% | ~15% | ~20% | 15-20%          | 4                           |
|                       |                      |      |      |      |      |      |      |      |      |      |                 |                             |
| Cre <sup>pos</sup> -1 | <5%                  | <5%  | <5%  | <5%  | <5%  | <5%  | <5%  | <5%  | <5%  | <5%  | <5%             | 5                           |
| Cre <sup>pos</sup> -2 | <5%                  | <5%  | <5%  | <5%  | <5%  | <5%  | <5%  | <5%  | <5%  | <5%  | <5%             | 5                           |
| Cre <sup>pos</sup> -3 | <5%                  | <5%  | <5%  | <5%  | <5%  | <5%  | <5%  | <5%  | <5%  | <5%  | <5%             | 5                           |
| Cre <sup>pos</sup> -4 | <5%                  | <5%  | <5%  | <5%  | <5%  | <5%  | <5%  | <5%  | <5%  | <5%  | <5%             | 5                           |

<sup>a</sup>Ten high-power fields (400X) centered on the terminal hepatic venule (for consistency) were scored for the percentage of the field with vacuolated cells

<sup>b</sup>Rank was determined by degree of steatosis with a rank of 1 being highest. Ties were designated as equal numbers.
