# Supplementary material for: Pdgfrα-Cre mediated knockout of the aryl hydrocarbon receptor protects mice from high-fat diet induced obesity and hepatic steatosis
Source: PubMed Central journal article supplement (PMC7392206; doi:10.1371/journal.pone.0236741), 2020-07-30

# Supplemental Figure 1B Raw Image

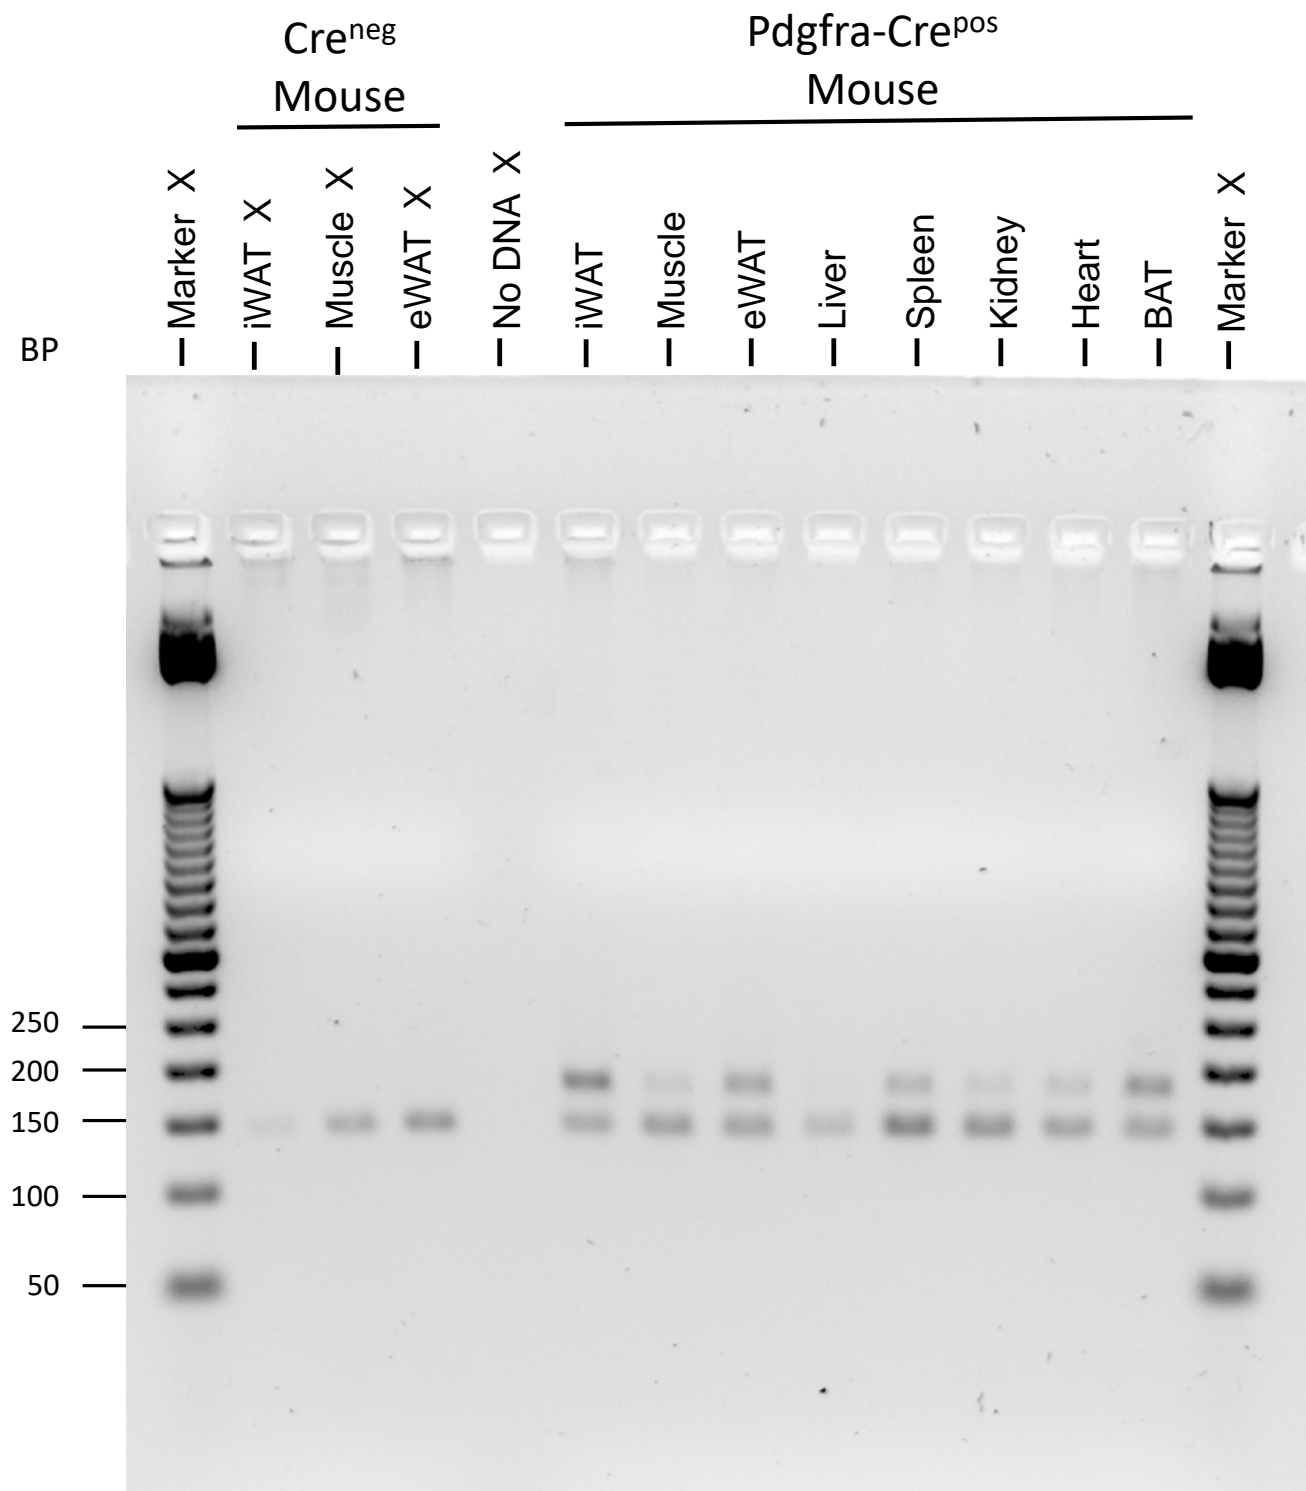

Supplemental Figure 1C Raw Image

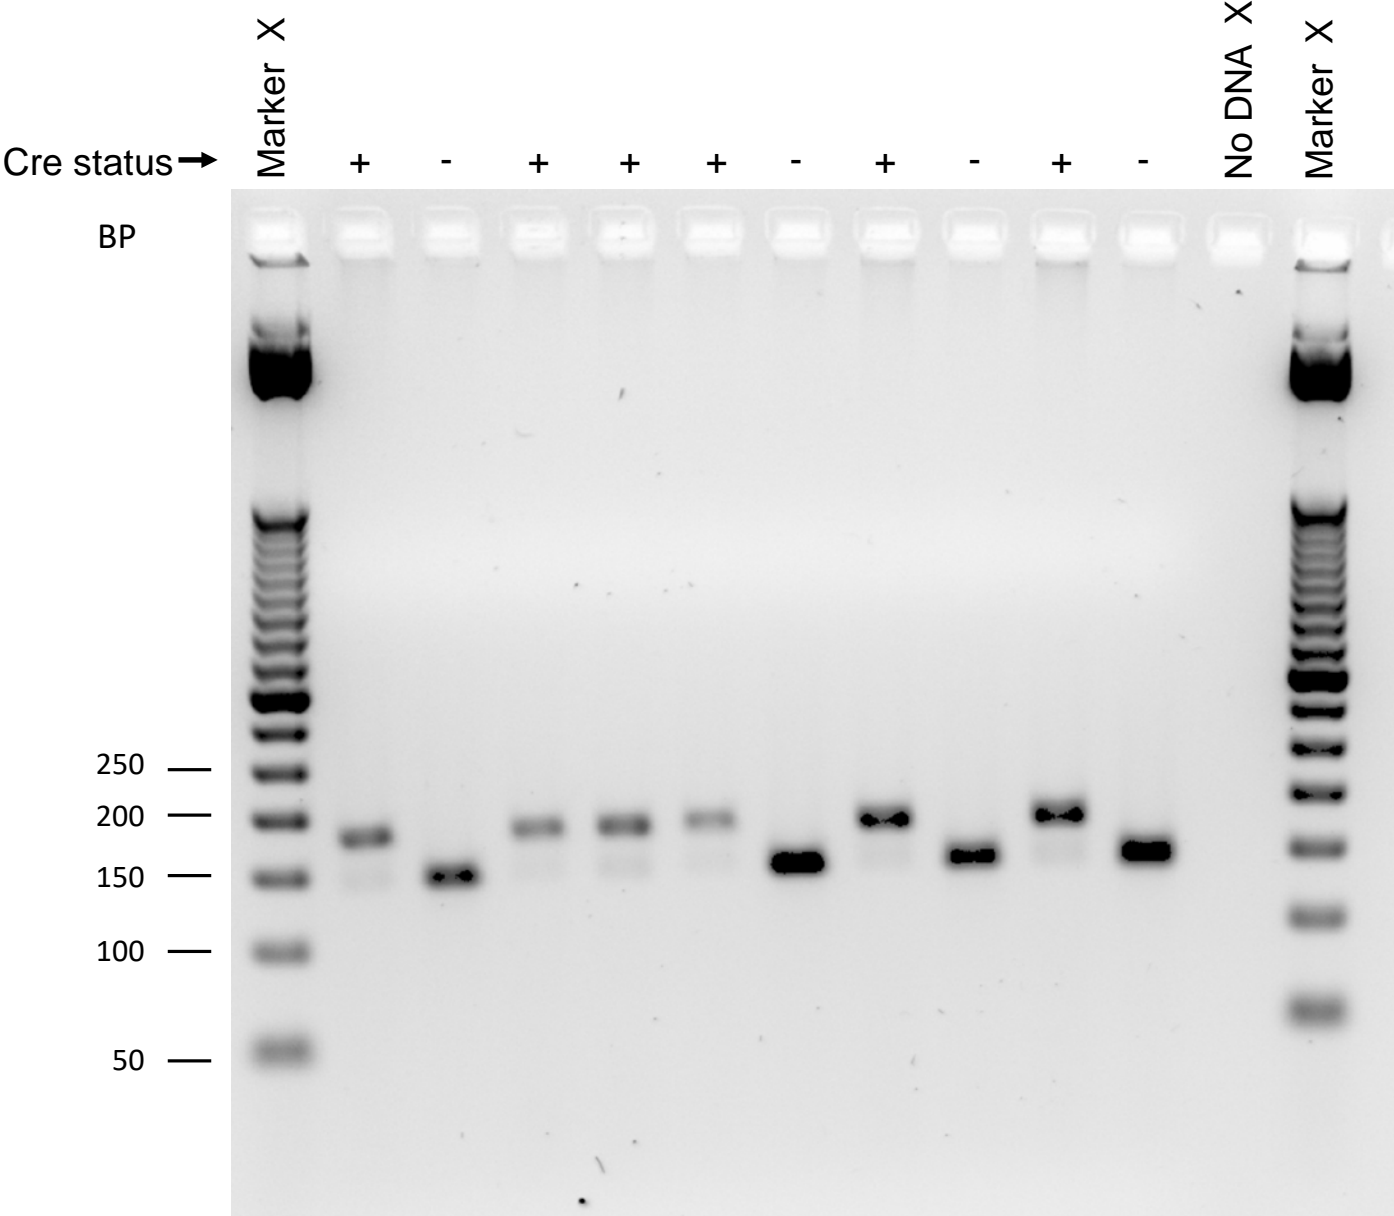

Supplement: pone.0236741.s005.pdf [file pone.0236741.s005.pdf]
